# Supplementary material
Source: MDPI journal article supplement (https://www.mdpi.com/2306-5729/9/2/30)
Supplement: s1 [file s1]

**Table S1** Class distribution of technical parameters in the dataset

| Class name          | Class distribution |
|---------------------|--------------------|
| Convolution Kernel  |                    |
| B                   | 1                  |
| BONE                | 10                 |
| BONEPLUS            | 83                 |
| D                   | 15                 |
| FC08                | 3                  |
| FC09                | 3                  |
| FC21                | 6                  |
| FC23                | 231                |
| FC26                | 197                |
| FC30                | 421                |
| FC35                | 2                  |
| FC62                | 47                 |
| FC64                | 8                  |
| FC68                | 79                 |
| FC81                | 1                  |
| H31s                | 8                  |
| H70h                | 8                  |
| J30s                | 49                 |
| J37s                | 13                 |
| J40s                | 21                 |
| J45s                | 2                  |
| J80s                | 77                 |
| SOFT                | 71                 |
| STANDARD            | 91                 |
| Sharp               | 1                  |
| UB                  | 22                 |
| YA                  | 1                  |
| YB                  | 6                  |
| SliceThickness      |                    |
| 0.500               | 367                |
| 0.625               | 92                 |
| 0.750               | 36                 |
| 0.900               | 1                  |
| 1.000               | 331                |
| 1.250               | 16                 |
| 1.500               | 12                 |
| 2.000               | 18                 |
| 2.500               | 74                 |
| 3.000               | 18                 |
| 5.000               | 8                  |
| Manufacturer        |                    |
| GE MEDICAL SYSTEMS  | 95                 |
| Mobius Imaging, LLC | 1                  |
| Philips             | 22                 |
| SIEMENS             | 85                 |
| TOSHIBA             | 572                |
| KVP                 |                    |
| 80                  | 1                  |
| 100                 | 1                  |

|     |     |
|-----|-----|
| 120 | 661 |
| 130 | 77  |
| 135 | 39  |
| 140 | 1   |
